# Supplementary material for: Ibrutinib interferes with innate immunity in chronic lymphocytic leukemia patients during COVID-19 infection
Source: PubMed Central journal article supplement — Haematologica. 2021 Mar 11;106(8):2265–8. doi: 10.3324/haematol.2020.277392 (PMC8327720; doi:10.3324/haematol.2020.277392), 2021-03-11
Supplement: 2020_277392_FIORCARI_SUPPL.pdf [file 2020_277392_FIORCARI_SUPPL.pdf]

**Ibrutinib interferes with innate immunity in chronic lymphocytic leukemia patients during COVID-19 infection**

*Stefania Fiorcari,<sup>1\*</sup> Claudio Giacinto Atene,<sup>1\*</sup> Rossana Maffei,<sup>2</sup> Giulia Debbia,<sup>1</sup> Leonardo Potenza,<sup>1,2</sup> Mario Luppi<sup>1,2</sup> and Roberto Marasca<sup>1,2</sup>*

*<sup>1</sup>Department of Medical and Surgical Sciences, Section of Hematology, University of Modena and Reggio Emilia, Modena and <sup>2</sup>Hematology Unit, Department of Oncology and Hematology, A.O.U of Modena, Policlinico, Modena, Italy*

*\*SF and CGA contribute equally as co-first authors.*

*Correspondence:*

*STEFANIA FIORCARI - stefania.fiorcari@unimore.it*

*ROBERTO MARASCA - roberto.marasca@unimore.it*

*doi:10.3324/haematol.2020.277392*

## Supplementary Figure legends

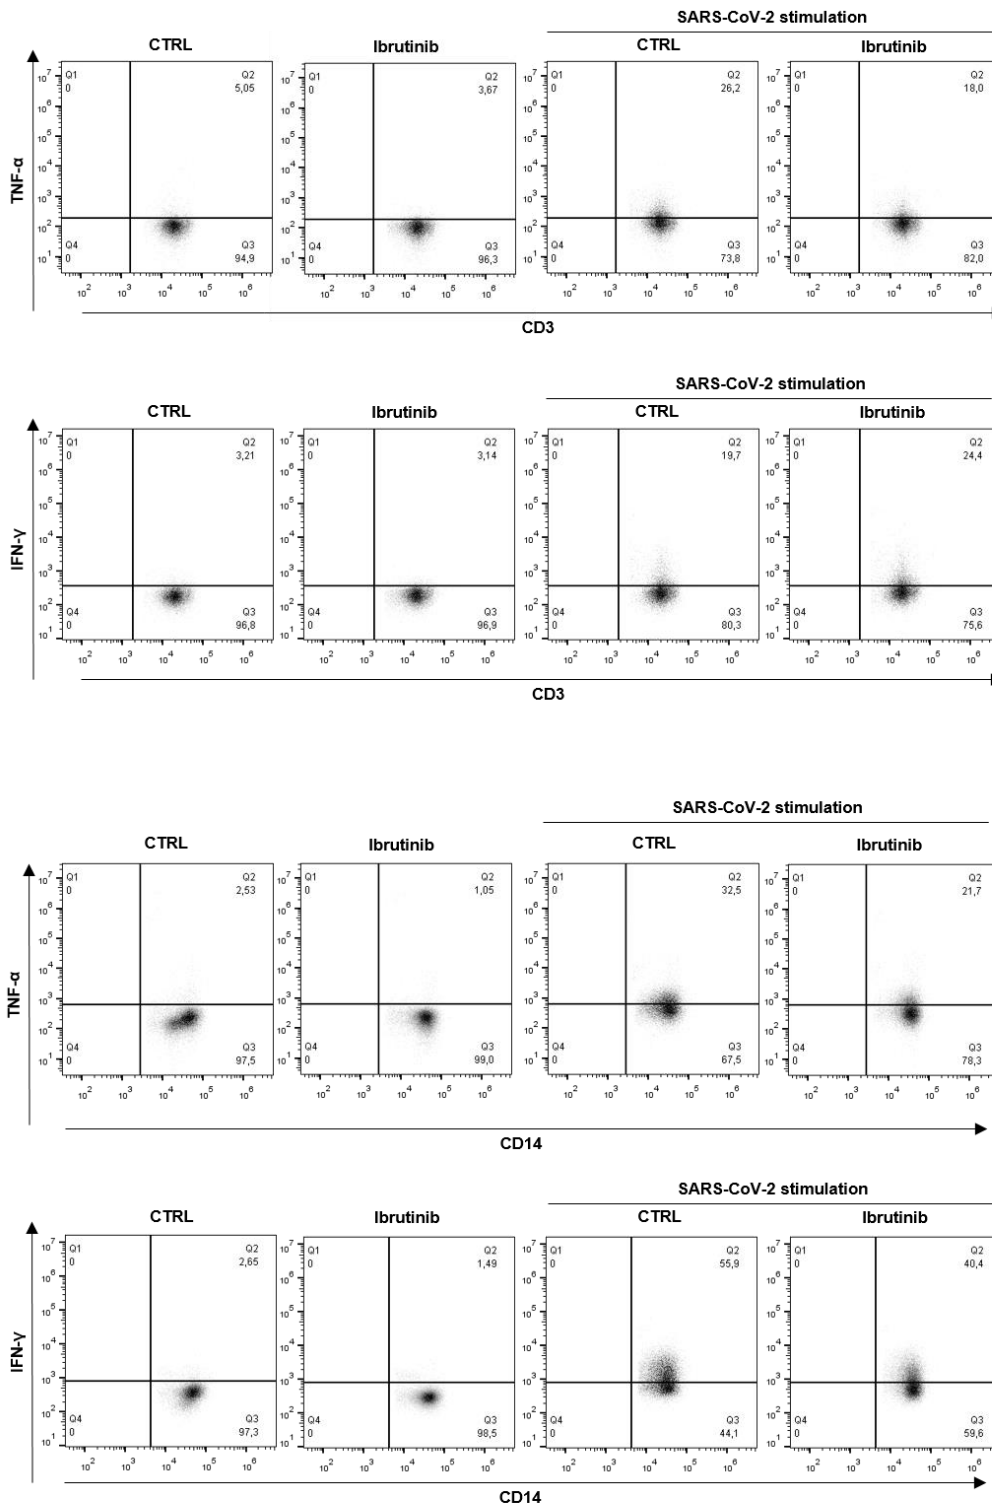

**Supplementary Figure S1**

**Supplementary Figure S1.** Scatter plots exemplify the secretion of TNF-α and IFN-γ by CD3+ and CD14+ cells after stimulation with SARS-CoV-2 peptides either in presence or absence of pre-treatment with ibrutinib in one representative CLL sample.

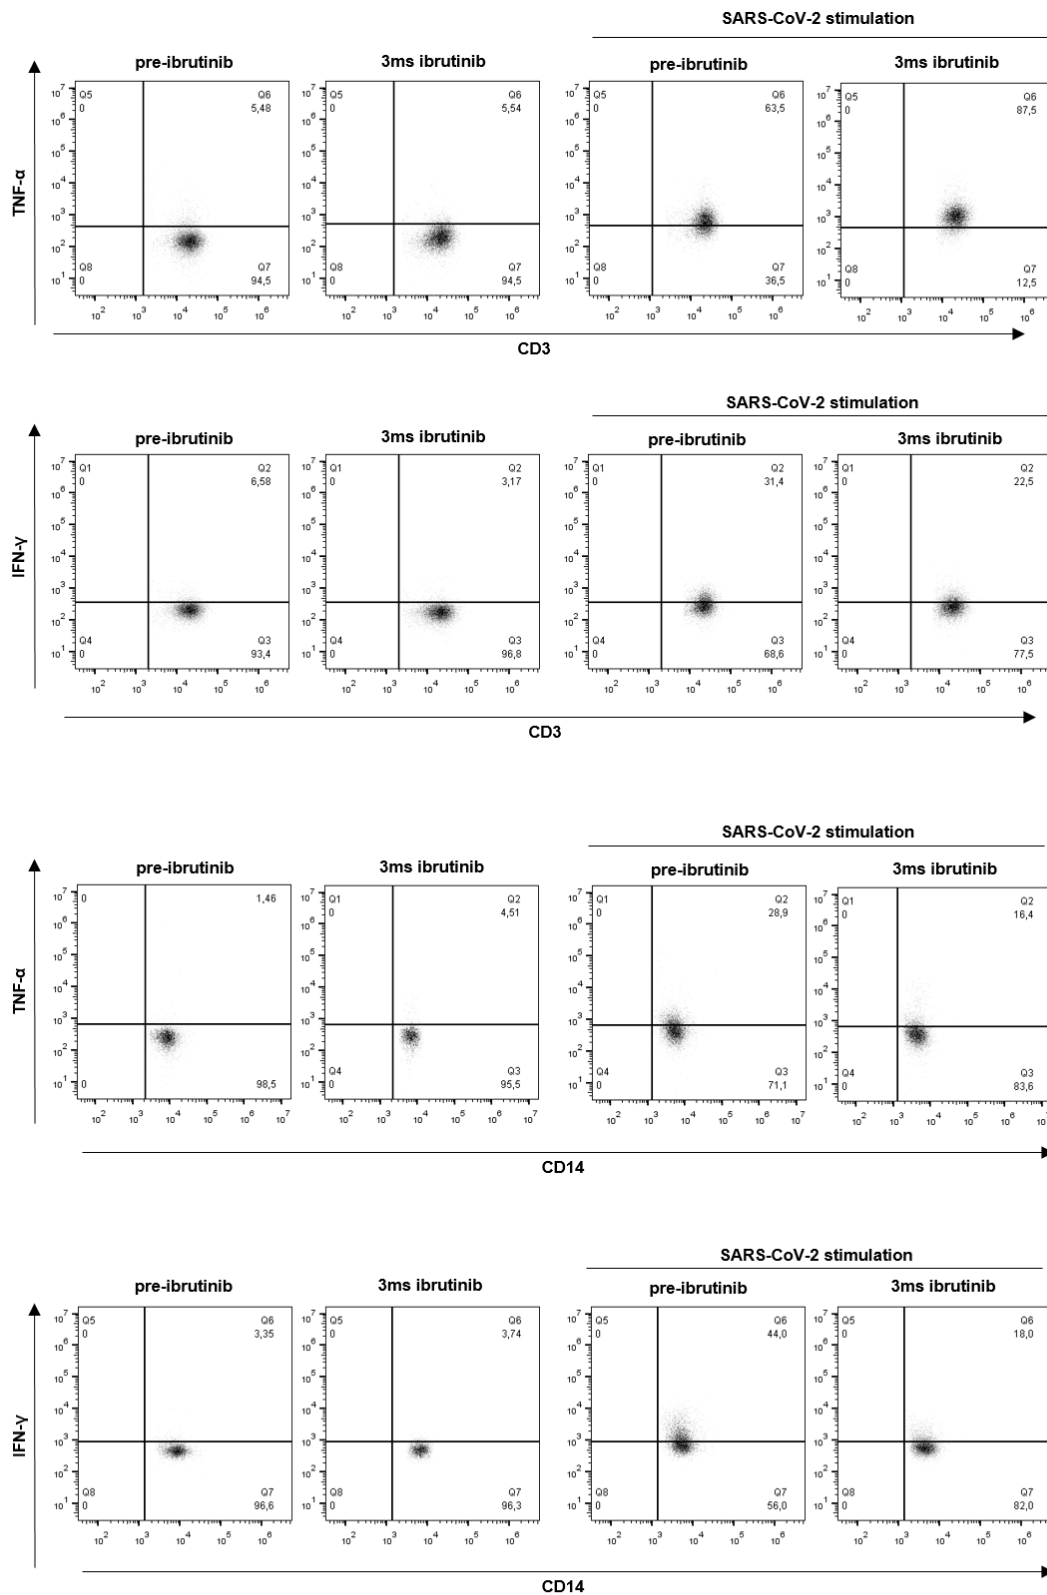

**Supplementary Figure S2**

**Supplementary Figure S2.** Scatter plots exemplify the secretion of TNF- $\alpha$  and IFN- $\gamma$  by CD3+ and CD14+ cells after stimulation with SARS-CoV-2 peptides pre-treatment and after 3 months of treatment with ibrutinib in one representative CLL sample.
